# Supplementary material for: Neighborhood Socioeconomic Deprivation and Allostatic Load: A Scoping Review
Source: PubMed Central journal article supplement (PMC6024893; doi:10.3390/ijerph15061092), 2018-05-28
Supplement: ijerph-15-01092-s001.pdf [file ijerph-15-01092-s001.pdf]

**Table S1 – Characteristics of the studies included in the scoping review.**

| 1 <sup>st</sup> Author, year, Country and study design | Aim(s)                                                                                                                                                                                   | Sample                                                                                                                                                                                                                                                  | Neighbourhood socioeconomic deprivation measurement                                                                                                                                                                                                                                                                                                                                                                                                                                                                        | Allostatic Load measurement                                                                                                                                                                                                                                                                                                                                                             | Control for confounding                                                                                                                                                                                                                                                         | Studied mediators                     | Key findings                                                                                                                                                                                                                                                                                                                                                                         |
|--------------------------------------------------------|------------------------------------------------------------------------------------------------------------------------------------------------------------------------------------------|---------------------------------------------------------------------------------------------------------------------------------------------------------------------------------------------------------------------------------------------------------|----------------------------------------------------------------------------------------------------------------------------------------------------------------------------------------------------------------------------------------------------------------------------------------------------------------------------------------------------------------------------------------------------------------------------------------------------------------------------------------------------------------------------|-----------------------------------------------------------------------------------------------------------------------------------------------------------------------------------------------------------------------------------------------------------------------------------------------------------------------------------------------------------------------------------------|---------------------------------------------------------------------------------------------------------------------------------------------------------------------------------------------------------------------------------------------------------------------------------|---------------------------------------|--------------------------------------------------------------------------------------------------------------------------------------------------------------------------------------------------------------------------------------------------------------------------------------------------------------------------------------------------------------------------------------|
| Barber 2016 USA<br>Cross-sectional                     | (1) To examine the association between neighbourhood disadvantage and cumulative biological risk (CBR)<br>(2) To examine whether the association differs by family income and education. | <b>Sample:</b> 4408 adults from 100 census tracts<br><b>Study:</b> Jackson Heart Study<br><b>Age:</b> 54.5y (mean)<br><b>Gender:</b> 63.5% female<br><b>Ethnicity:</b> African American<br><b>Region:</b> Metropolitan area, Jackson, Mississippi, USA. | 8 variables from 2000 US Census at census tract level composed of 1200-8000 inhab/area (dichotomized at the median value):<br>. % Households below poverty line<br>. % Households receiving public assistance<br>. % Occupied housing units with no vehicle<br>. % Adults ≥25 years with less than high school education<br>. % Unemployed individuals ≥16 years in the civilian labour force<br>. % Housing units unoccupied<br>. % Occupied housing units with >1 person/room (crowding)<br>. % Female-headed households | <b>Calculus:</b> Score derived from the sum of biomarker z-scores, covering: cardiovascular metabolic, inflammatory, neuroendocrine systems.<br><b>Biomarkers:</b> 8 biomarkers<br>. Systolic BP<br>. Systolic BP<br>. Resting heart rate<br>. HbA1c<br>. Total cholesterol–HDL cholesterol ratio<br>. Waist circumference<br>. High sensitivity C-reactive protein<br>. Serum cortisol | . Age, gender, family income, educational attainment<br><br>. Health behaviours (physical activity, percentage of calories from dietary fat, cigarette smoking status, and alcohol consumption)                                                                                 | None                                  | Association between living in a disadvantaged neighbourhood and CBR was strongest among men living in neighbourhoods with low levels of social cohesion (b=0.63, standard error=0.32)                                                                                                                                                                                                |
| Barber 2016 USA<br>Cross-sectional                     | (1) To examine the association between neighbourhood disadvantage and cumulative biological risk (CBR)<br>(2) To examine whether the association differs by family income and education. | <b>Sample:</b> 4410 adults from 102 census tracts<br><b>Study:</b> Jackson Heart Study<br><b>Age:</b> 54.5y (mean)<br><b>Gender:</b> 63.5% female<br><b>Ethnicity:</b> African American<br><b>Region:</b> Metropolitan area, Jackson, Mississippi, USA. | 8 variables from 2000 US Census at census tract level (dichotomized at the median value):<br>. % Households below poverty line<br>. % Households receiving public assistance<br>. % Occupied housing units with no vehicle<br>. % Adults ≥25 years with less than high school education<br>. % Unemployed individuals ≥16 years in the civilian labour force<br>. % Housing units unoccupied<br>. % Occupied housing units with >1 person/room (crowding)<br>. % Female-headed households                                  | <b>Calculus:</b> Score derived from the sum of biomarker z-scores, covering: cardiovascular metabolic, inflammatory, neuroendocrine systems.<br><b>Biomarkers:</b> 8 biomarkers<br>. Systolic BP<br>. Systolic BP<br>. Resting heart rate<br>. HbA1c<br>. Total cholesterol–HDL cholesterol ratio<br>. Waist circumference<br>. High sensitivity C-reactive protein<br>. Serum cortisol | . Age, gender, family income, educational attainment<br><br>. Health behaviours (physical activity, percentage of calories from dietary fat, cigarette smoking status, and alcohol consumption)<br><br>. Anti-hypertensive and lipid-lowering medication (sensitivity analysis) | None                                  | Living in a disadvantaged neighbourhood was associated with greater CBR after covariate adjustment (b=0.18, p<0.05).<br><br>Interactions showed a weaker association for individuals with ≤high school education but were not statistically significant.<br><br>System-specific analysis revealed stronger associations in the sub index of the metabolic and neuroendocrine system. |
| Robinette 2016 USA<br>Cross-sectional                  | Examine whether lower neighborhood income would relate to higher                                                                                                                         | <b>Sample:</b> 995 adults from 979 census tracts.<br><b>Study:</b> Biomarker Project of the Midlife in the United States (MIDUS)                                                                                                                        | Neighbourhood income: median household income at the census tract level, collected from the 2000 US Census.                                                                                                                                                                                                                                                                                                                                                                                                                | <b>Calculus:</b> Sum of dichotomized biomarkers based on clinically accepted “high risk” criteria according to different biological systems.                                                                                                                                                                                                                                            | .Individual income<br>.Age<br>.Gender                                                                                                                                                                                                                                           | .Neighbourhood safety (psychological) | People living in higher income neighbourhoods have lower AL (b=−0.05, p<0.001).                                                                                                                                                                                                                                                                                                      |

|                                  |                                                                                                                                                                        |                                                                                                                                                                                                                                                                                                                                         |                                                                                                                                                                                                                       |                                                                                                                                                                                                                                                                                                                                                                                                                                                                                                                                                                                                                                                                                                                                                                                                                                                                                                                                  |                                                                                                                                                                                                                                                                                                                                                      |                                                                                                                                                                                                                                                                                                                                       |
|----------------------------------|------------------------------------------------------------------------------------------------------------------------------------------------------------------------|-----------------------------------------------------------------------------------------------------------------------------------------------------------------------------------------------------------------------------------------------------------------------------------------------------------------------------------------|-----------------------------------------------------------------------------------------------------------------------------------------------------------------------------------------------------------------------|----------------------------------------------------------------------------------------------------------------------------------------------------------------------------------------------------------------------------------------------------------------------------------------------------------------------------------------------------------------------------------------------------------------------------------------------------------------------------------------------------------------------------------------------------------------------------------------------------------------------------------------------------------------------------------------------------------------------------------------------------------------------------------------------------------------------------------------------------------------------------------------------------------------------------------|------------------------------------------------------------------------------------------------------------------------------------------------------------------------------------------------------------------------------------------------------------------------------------------------------------------------------------------------------|---------------------------------------------------------------------------------------------------------------------------------------------------------------------------------------------------------------------------------------------------------------------------------------------------------------------------------------|
|                                  | allostatic load (AL), or physiological well-being, through psychological, affective, and behavioral pathways.                                                          | <p><b>Age:</b> 55.2y (mean)<br/> <b>Gender:</b> 55.5% females<br/> <b>Ethnicity:</b> Not stated<br/> <b>Region:</b> USA</p>                                                                                                                                                                                                             |                                                                                                                                                                                                                       | <p><b>Biomarkers:</b> 24 biomarkers<br/>                 . Systolic BP<br/>                 . Diastolic BP<br/>                 . Resting heart rate<br/>                 . Cortisol<br/>                 . DHEAS-S<br/>                 . C-reactive protein<br/>                 . Fibrinogen<br/>                 . IL-6<br/>                 . e-Selectin<br/>                 . ICAM-1<br/>                 . HbA1c<br/>                 . Fasting glucose<br/>                 . HOMA-IR<br/>                 . HDL<br/>                 . LDL<br/>                 . Triglycerides<br/>                 . BMI<br/>                 . waist hip ratio<br/>                 . low frequency spectral power<br/>                 . high frequency spectral power<br/>                 . standard deviation of IBIs<br/>                 . RMSSD<br/>                 . Epinephrine<br/>                 . Norepinephrine</p> | <p>.Neighbourhood cohesion (psychological)<br/>                 .Affective distress<br/>                 .Health behaviours</p>                                                                                                                                                                                                                      | Partially explained by affective and behavioural pathways.                                                                                                                                                                                                                                                                            |
| Chen 2015 USA<br>Longitudinal    | To test the skin-deep resilience hypothesis by assessing the effect of residing in low SES neighbourhoods on AL and see if it differs according to college attendance. | <p><b>Sample:</b> 452 youth from 91 census tracts.<br/> <b>Study:</b> Strong African American Families Healthy Adult Panel (SHAPE)<br/> <b>Age:</b> 20.4y (mean) in the last assessment<br/> <b>Gender:</b> 55% female<br/> <b>Ethnicity:</b> African American<br/> <b>Region:</b> disadvantaged and rural counties of Georgia, UA.</p> | Neighbourhood poverty (percentage of residents in a neighbourhood living below poverty) at census tract-level from 2010 US Census Bureau’s American Community Survey.                                                 | <p><b>Calculus:</b> Scored derived sum biomarker z-scores.<br/> <b>Biomarkers:</b> 6 biomarkers.<br/>                 . Systolic BP<br/>                 . Diastolic BP<br/>                 . Urinary epinephrine<br/>                 . Urinary norepinephrine<br/>                 . Urinary cortisol<br/>                 . BMI</p>                                                                                                                                                                                                                                                                                                                                                                                                                                                                                                                                                                                          | <p>. Age<br/>                 . Gender<br/>                 . Neighbourhood ethnic composition<br/>                 . Cumulative family socioeconomic risk<br/>                 . Primary caregivers’ college attendance<br/>                 . Co-habitation<br/>                 . Financial stress<br/>                 . Hours of employment</p> | None<br>Among those not in college, neighbourhood poverty was not associated with AL. However, among those in college, coming from a neighbourhood with greater poverty was associated with higher AL (b=5.774, p=0.022). AL was highest among youth who, at age 19, lived in high-poverty neighbourhoods and were attending college. |
| Jiménez 2015 USA<br>Longitudinal | To test the impact of baseline neighbourhood context (neighbourhood socioeconomic status and relative income of                                                        | <p><b>Sample:</b> 1258 adults from 318 block groups<br/> <b>Study:</b> The Boston Puerto Rican Health Study<br/> <b>Age:</b> 57.1y (mean)<br/> <b>Gender:</b> 70% female<br/> <b>Ethnicity:</b> Puerto Ricans</p>                                                                                                                       | Score derived from 6 variables available in 2000 US Census at block-group level:<br>. % adults >25 years with less than a high school education,<br>. % male unemployment<br>. % households with income below poverty | <p><b>Calculus:</b> Score derived from dichotomized variables; dichotomization based on clinical cut offs when available (for neuroendocrine parameters the upper quartile was used).<br/> <b>Biomarkers:</b> 11 biomarkers<br/>                 . Systolic BP</p>                                                                                                                                                                                                                                                                                                                                                                                                                                                                                                                                                                                                                                                               | <p>. Gender, age and individual-level socioeconomic position<br/>                 . City and length of time lived at the current residence<br/>                 . Baseline AL</p>                                                                                                                                                                    | None<br>The neighbourhood deprivation score only showed significance ( $\beta = -0.120$ , $p=0.05$ ) when jointly adjusting for relative income. After adjustment for individual-level SES and demographics the association became <u>non-significant</u> .                                                                           |

|                                        |                                                                                                                                                                                                                                                 |                                                                                                                                                                                                                                                                                                |                                                                                                                                                                                                                                                                                                                                                                                                                                                 |                                                                                                                                                                                                                                                                                                                                                                                                            |                                                                                                                                                                                                                              |      |                                                                                                                                                                                                                                                                                                                                                                                                                          |
|----------------------------------------|-------------------------------------------------------------------------------------------------------------------------------------------------------------------------------------------------------------------------------------------------|------------------------------------------------------------------------------------------------------------------------------------------------------------------------------------------------------------------------------------------------------------------------------------------------|-------------------------------------------------------------------------------------------------------------------------------------------------------------------------------------------------------------------------------------------------------------------------------------------------------------------------------------------------------------------------------------------------------------------------------------------------|------------------------------------------------------------------------------------------------------------------------------------------------------------------------------------------------------------------------------------------------------------------------------------------------------------------------------------------------------------------------------------------------------------|------------------------------------------------------------------------------------------------------------------------------------------------------------------------------------------------------------------------------|------|--------------------------------------------------------------------------------------------------------------------------------------------------------------------------------------------------------------------------------------------------------------------------------------------------------------------------------------------------------------------------------------------------------------------------|
|                                        | individuals compared to their neighbours) on allostatic load two years later.                                                                                                                                                                   | <b>Region:</b> Greater Boston area, USA; mainly urban but also suburban                                                                                                                                                                                                                        | . % households receiving public assistance<br>. % female-headed households with children<br>. Median household income                                                                                                                                                                                                                                                                                                                           | . Diastolic BP<br>. Waist-hip ratio<br>. Serum HDL cholesterol<br>. Total cholesterol<br>. Serum DHEA-S<br>. Plasma concentration of total glycosylated haemoglobin<br>. Urinary cortisol<br>. Urinary norepinephrine<br>. Urinary epinephrine<br>. C-reactive protein<br>. An additional point was assigned to account for relevant medication use when the parameter was within the established cut off. |                                                                                                                                                                                                                              |      |                                                                                                                                                                                                                                                                                                                                                                                                                          |
| Brody 2014 USA<br>Longitudinal         | (1) To determine the effects that changes in neighbourhood poverty levels have on AL<br>(2) To investigate the possibility that the receipt of emotional support during adolescence has a protective effect.                                    | <b>Sample:</b> 420 youth in 41 census tracts.<br><b>Age:</b> mean: 11.2y (first assessment); 19.2y (last).<br><b>Gender:</b> 53% female<br><b>Ethnicity:</b> African American<br><b>Region:</b> disadvantaged and rural counties of Georgia, USA                                               | Neighbourhood poverty level (proportion of households below the federal poverty level) obtained from 2000 STF3A census tract data (11y) and 2010 US Census Bureau’s American Community Survey (19y).                                                                                                                                                                                                                                            | <b>Calculus:</b> Scored derived from dichotomized biomarkers; dichotomized based on quartiles (top quartile=high risk).<br><br><b>Biomarkers:</b> 6 biomarkers.<br>. Systolic BP<br>. Diastolic BP<br>. Urinary epinephrine<br>. Urinary norepinephrine<br>. Urinary cortisol<br>. BMI                                                                                                                     | . Gender<br>. Family poverty status at age 11, age 19, and their interaction<br>. Primary caregiver employment status<br>. youths’ diet, smoking, alcohol use<br>. Perceived life stress at age 19<br>. Residential mobility | None | Living in neighbourhood environments that become poorer over time was associated with AL (b=0.21, p=0.05), but only when they did not receive high levels of emotional support (b=0.61 p<0.001). (Slopen, 2012 #9; Schulz, 2013 #32; Schulz, 2012 #28; Robinette, 2016 #30; Merkin, 2009 #36; King, 2011 #58; Gustafsson, 2014 #33; Chen, 2015 #39; Brody, 2014 #35; Bird, 2010 #38; Barber, 2016 #74; Barber, 2016 #59) |
| Gustafsson 2014 Sweden<br>Longitudinal | (1) Examine whether socioeconomic disadvantage of the residence neighbourhood at 4 time points during the life course were cumulatively related to AL in mid-adulthood.<br>(2) Explore the cumulative effect on AL separately in women and men. | <b>Sample:</b> 818 individuals in 374 SAMS.<br><b>Study:</b> Northern Swedish Cohort<br><b>Age:</b> 16y (wave 1), 21y (wave 2) 30y (wave 3) and 43y (wave 4).<br><b>Gender:</b> 47.9% female<br><b>Ethnicity:</b> Not stated<br><b>Region:</b> middle-sized industrial town in northern Sweden | Composite index derived from 8 variables from Statistics Sweden at SAMS level (mean 1000 individuals per area)<br>. Annual household income ≤ 10 <sup>th</sup> percentile of the Swedish population<br>. Annual household income ≥ 90 <sup>th</sup> percentile of the Swedish population<br>. Housing allowance<br>. Wealth tax payment<br>. Non-employment<br>. Single-parent households<br>. Occupational status<br>. Educational attainment. | <b>Calculus:</b> Score derived from dichotomized biomarkers; tertiles separately for women and men<br><br><b>Biomarkers:</b> 12 biomarkers at 43 years:<br>. Systolic BP<br>. Diastolic BP<br>. BMI<br>. Waist circumference<br>. Fasting glucose<br>. Total cholesterol<br>. HDL cholesterol<br>. Triglycerides<br>. Apolipoprotein A1<br>. Apolipoprotein B<br>. C-reactive protein                      | . Gender<br>. Cumulative socioeconomic disadvantage<br>. Social and material adversity                                                                                                                                       | None | The cumulative neighbourhood disadvantage between ages 16 and 43 years was related to AL at age 43 years after adjusting for personal living conditions in the total sample (b=0.11; p=0.004) and in men (b=0.16; p=0.004), but not in women (b=0.07; p=0.248).                                                                                                                                                          |

|                                     |                                                                                                                                                                 |                                                                                                                                                                                                                                                                                                                            |                                                                                                                                                                                                                                                                                                                                                                                                      |                                                                                                                                                                                                                                                                                                                                                 |                                                                                                                                                                                                                                              |                                                                                                                  |                                                                                                                                                                                                                                                                                                                                   |
|-------------------------------------|-----------------------------------------------------------------------------------------------------------------------------------------------------------------|----------------------------------------------------------------------------------------------------------------------------------------------------------------------------------------------------------------------------------------------------------------------------------------------------------------------------|------------------------------------------------------------------------------------------------------------------------------------------------------------------------------------------------------------------------------------------------------------------------------------------------------------------------------------------------------------------------------------------------------|-------------------------------------------------------------------------------------------------------------------------------------------------------------------------------------------------------------------------------------------------------------------------------------------------------------------------------------------------|----------------------------------------------------------------------------------------------------------------------------------------------------------------------------------------------------------------------------------------------|------------------------------------------------------------------------------------------------------------------|-----------------------------------------------------------------------------------------------------------------------------------------------------------------------------------------------------------------------------------------------------------------------------------------------------------------------------------|
|                                     |                                                                                                                                                                 |                                                                                                                                                                                                                                                                                                                            |                                                                                                                                                                                                                                                                                                                                                                                                      | . Cortisol area under the curve                                                                                                                                                                                                                                                                                                                 |                                                                                                                                                                                                                                              |                                                                                                                  |                                                                                                                                                                                                                                                                                                                                   |
| Slopen 2014 USA<br>Cross-sectional  | To evaluate the association between childhood adversity and CBR in adulthood, and to examine whether this relationship varied by adult neighbourhood affluence. | <b>Sample:</b> 550 adults in 80 focal neighbourhood clusters.<br><b>Study:</b> Chicago Community Adult Health Study (CCAHS)<br><b>Age:</b> 44.3y (mean)<br><b>Gender:</b> 54.1% females<br><b>Ethnicity:</b> Blacks, Non-Hispanic whites, Native and foreign Hispanics<br><b>Region:</b> Chicago city, USA                 | Neighbourhood affluence calculated using data at census tract level from 2000 US Census (average value of standardized variables):<br>. Proportion of employed civilians aged ≥16 years in professional/managerial occupations<br>. Proportion of individuals aged ≥25 years who have completed ≥16 years of education<br>. Median home values (Categorized into tertiles of neighborhood affluence) | <b>Calculus:</b> Sum of dichotomized biomarkers based on clinically accepted “high risk” criteria.<br><b>Biomarkers:</b> 8 biomarkers<br>. Systolic BP<br>. Diastolic BP<br>. Resting heart rate<br>. Glycosylated Hemoglobin A1c<br>. C-reactive protein<br>. Waist size<br>. Total cholesterol<br>. HDL cholesterol                           | .Gender<br>. Age<br>. Ethnicity<br>. Medication                                                                                                                                                                                              | None                                                                                                             | Higher neighbourhood affluence was associated with a lower CBR, independent of childhood adversity and the other covariates in the models (IRR=0.82, 95% CI=0.74, 0.92).                                                                                                                                                          |
| Schulz 2013 USA<br>Cross-sectional  | To examine contributions of observed and perceived neighbourhood characteristics in explaining associations between neighbourhood poverty and CBR.              | <b>Sample:</b> 919 adults older than 25 years from 69 block groups<br><b>Study:</b> Healthy Environments Partnership Community Survey<br><b>Age:</b> 46.3y (mean)<br><b>Gender:</b> 52.3% female<br><b>Ethnicity:</b> non-Hispanic White, non-Hispanic Black or Mexican-American<br><b>Region:</b> Detroit, Michigan, USA. | . Neighbourhood poverty (percentage of households below the poverty line at the census block group level, derived from 2000 US Census data).                                                                                                                                                                                                                                                         | <b>Calculus:</b> Sum of dichotomized biomarkers based on clinically accepted “high risk” criteria.<br><b>Biomarkers:</b> 8 biomarkers.<br>. Diastolic BP<br>. Systolic BP<br>. Waist circumference<br>. Glucose<br>. Total cholesterol<br>. HDL<br>. LDL<br>. Self-reported use of medication for hypertension, diabetes and hypercholesteremia | . Individual age<br>. Gender<br>. Household income below poverty<br>. Education<br>. Race and ethnicity<br>. Metabolic<br>. Healthy eating index<br>. Smoking and alcohol use<br>. Neighbourhood percent African American and percent Latino | Perceived (social and physical environment) and observed (disorder, deterioration) neighbourhood characteristics | There is an inverse association between neighbourhood poverty and CBR, with those residing in neighbourhoods with the highest levels of poverty most likely to have higher CBR.<br><br>Observed and perceived neighbourhood characteristics mediated this association.                                                            |
| Wallace 2013 USA<br>Cross-sectional | To examine the relationships between allostatic load, race, and adverse birth outcomes within the context of neighbourhood-level poverty.                       | <b>Sample:</b> 866 adult women from 55 census block groups.<br><b>Study:</b> Bogalusa Heart Study<br><b>Age:</b> mean of 13.4y and 15.8y for African American and White, respectively<br><b>Gender:</b> 100% female<br><b>Ethnicity:</b> 352 African American and 514 White<br><b>Region:</b> Louisiana, USA.              | Neighbourhood poverty: % of households living below the federal poverty level at block group-level (mean 600-3000 inhabit/areas) available for the 1990 and 2000 census.<br>Dichotomized in high/low poverty                                                                                                                                                                                         | <b>Calculus:</b> Score derived from dichotomized biomarkers based on age-adjusted quantiles.<br><b>Biomarkers:</b> 9 biomarkers<br>. Systolic BP<br>. Diastolic BP<br>. Total cholesterol<br>. HDL cholesterol<br>. LDL cholesterol<br>. Triglycerides<br>. Glucose<br>. Insulin<br>. Waist circumference.                                      | Propensity score matching. Adjustment for maternal age, smoking during pregnancy, year of BHS examination and years between examination and conception.                                                                                      | None                                                                                                             | Twenty-two percent (n=76) of African American mothers had high allostatic load and lived in high poverty neighbourhoods compared to only 3.3% (n= 17) of white women. Yet, there was no significant association between neighbourhood poverty level and allostatic load in this sample with adjustment for race (data not shown). |
| Schulz 2012 USA                     | (1)To understand whether neighbourhood                                                                                                                          | <b>Sample:</b> 919 adults from 69 block groups                                                                                                                                                                                                                                                                             | . Neighbourhood poverty (percentage of households below the poverty line) at                                                                                                                                                                                                                                                                                                                         | <b>Calculus:</b> Sum of dichotomized biomarkers based on clinically accepted “high risk” criteria.                                                                                                                                                                                                                                              | . % of Non-Hispanic Black<br>. % of Hispanic                                                                                                                                                                                                 | .Psychosocial stress associated                                                                                  | Neighbourhood poverty was significantly (b=0.012; p =0.019) and positively associated with AL.                                                                                                                                                                                                                                    |

|                                               |                                                                                                                                                                                                                                          |                                                                                                                                                                                                                                                                                                                                         |                                                                                                                                                                                                                                                                                                                                                                                                                                                                                                      |                                                                                                                                                                                                                                                                                                                                                                                                                                             |                                                                                                                                                                                                                                                                                 |                                                                                                                                                                |                                                                                                                                                                                                                                                                                                                                                                                                                          |
|-----------------------------------------------|------------------------------------------------------------------------------------------------------------------------------------------------------------------------------------------------------------------------------------------|-----------------------------------------------------------------------------------------------------------------------------------------------------------------------------------------------------------------------------------------------------------------------------------------------------------------------------------------|------------------------------------------------------------------------------------------------------------------------------------------------------------------------------------------------------------------------------------------------------------------------------------------------------------------------------------------------------------------------------------------------------------------------------------------------------------------------------------------------------|---------------------------------------------------------------------------------------------------------------------------------------------------------------------------------------------------------------------------------------------------------------------------------------------------------------------------------------------------------------------------------------------------------------------------------------------|---------------------------------------------------------------------------------------------------------------------------------------------------------------------------------------------------------------------------------------------------------------------------------|----------------------------------------------------------------------------------------------------------------------------------------------------------------|--------------------------------------------------------------------------------------------------------------------------------------------------------------------------------------------------------------------------------------------------------------------------------------------------------------------------------------------------------------------------------------------------------------------------|
| <p>Cross-sectional</p>                        | <p>poverty is associated with AL, independent of household income (2)To test the hypothesis that relationships between neighbourhood poverty and AL are mediated by self-reported psychosocial stress and health related behaviours.</p> | <p><b>Study:</b> Healthy Environments Partnership Community Survey<br/> <b>Age:</b> 46.3y (mean)<br/> <b>Gender:</b> 52.3% female<br/> <b>Ethnicity:</b> non-Hispanic White, non-Hispanic Black or Mexican-American<br/> <b>Region:</b> Detroit, Michigan, USA.</p>                                                                     | <p>the census block group level, derived from 2000 US Census data.</p>                                                                                                                                                                                                                                                                                                                                                                                                                               | <p><b>Biomarkers:</b> 8 biomarkers.<br/>         . Diastolic BP<br/>         . Systolic BP<br/>         . Waist circumference<br/>         . Glucose<br/>         . Total cholesterol<br/>         . Triglycerides<br/>         . HDL<br/>         . LDL<br/>         .Self-reported use of medication for hypertension, diabetes and hypercholestermia</p>                                                                                 | <p>. Individual age<br/>         . Gender<br/>         . Household income below poverty<br/>         . Education<br/>         . Race/ethnicity<br/>         . length of residence (sensitivity analysis)</p>                                                                    | <p>with neighbourhood conditions (13 indicators of social and physical characteristics of the neighbourhood environment.)<br/>         . Health behaviours</p> | <p>The relationship was mediated by neighbourhood environment stress. No differential effect according to race.</p>                                                                                                                                                                                                                                                                                                      |
| <p>King 2011 USA<br/><br/>Cross-sectional</p> | <p>To examine the role of neighbourhood context in CBR and racial/ethnic and socioeconomic disparities.</p>                                                                                                                              | <p><b>Sample:</b> 549 adults in 80 focal neighbourhood clusters.<br/> <b>Study:</b> Chicago Community Adult Health Study (CCAHS)<br/> <b>Age:</b> 43y (mean)<br/> <b>Gender:</b> 53.9% female<br/> <b>Ethnicity:</b> Blacks, Non-Hispanic whites, Native and foreign Hispanics<br/> <b>Region:</b> Chicago city, USA.</p>               | <p>Neighbourhood socioeconomic disadvantage:<br/>         . Proportion of households with incomes of less than 15000USD and of at least 50000USD<br/>         . Families in poverty<br/>         . Households on public assistance<br/>         . Unemployment<br/>         . Vacant housing units<br/><br/>         Neighbourhood affluence:<br/>         . Employed civilians;<br/>         . Individuals who have completed 16 or more years of education;<br/>         . Median home values.</p> | <p><b>Calculus:</b> Sum of dichotomized biomarkers based on clinically accepted “high risk” criteria.<br/><br/> <b>Biomarkers:</b> 8 biomarkers<br/>         . Systolic BP<br/>         . Diastolic BP<br/>         . Resting heart rate<br/>         . Glycosylated Hemoglobin A1c<br/>         . C-reactive protein<br/>         . Waist size<br/>         . Total cholesterol<br/>         . HDL cholesterol</p>                         | <p>. Race/ethnicity<br/>         . Gender<br/>         . Age<br/>         . Immigrant generation<br/>         . Educational attainment<br/>         . Income<br/>         . Health behaviours (physical activity, fruit and vegetable intake, smoking and drinking alcohol)</p> | <p>None</p>                                                                                                                                                    | <p>Neighbourhood affluence predicted lower levels of CBR (IRR=0.82, p&lt;0.027), but neighbourhood disadvantage was not significantly associated with CBR (IRR=1.00, p&lt;0.948)</p>                                                                                                                                                                                                                                     |
| <p>Bird 2010 USA<br/><br/>Cross-sectional</p> | <p>To assess whether neighbourhood socioeconomic status is independently associated with disparities in AL.</p>                                                                                                                          | <p><b>Sample:</b> 13,184 adults from 1805 neighbourhoods<br/> <b>Study:</b> Third National Health and Nutrition Examination Survey (1988-1994) (NHANES III)<br/> <b>Age:</b> 45y (mean)<br/> <b>Gender:</b> 51.9% female<br/> <b>Ethnicity:</b> non-Hispanic White, non-Hispanic Black or Mexican-American.<br/> <b>Region:</b> USA</p> | <p>Sum of six census tract-level standardized variables:<br/>         . % adults ≥25 years with less than a high school education<br/>         . % male unemployment<br/>         . % households with income below the poverty line<br/>         . % households receiving public assistance<br/>         . % female-headed households with children<br/>         . median household income</p>                                                                                                       | <p>Calculus: Sum of dichotomized biomarkers based on clinically accepted “high risk” criteria.<br/><br/>         Biomarkers: 9 biomarkers pertaining to inflammatory, metabolic and cardiovascular system.<br/>         . Albumin (inflammatory)<br/>         . C-reactive protein (inflammatory)<br/>         . Waist-to-hip ratio (metabolic)<br/>         . Total cholesterol (metabolic)<br/>         . HDL cholesterol (metabolic)</p> | <p>. Age<br/>         . Gender<br/>         . Race/ethnicity<br/>         . Education<br/>         . Poverty Income Ratio<br/>         . Marital status<br/>         . Nativity</p>                                                                                             | <p>None</p>                                                                                                                                                    | <p>Living in a lower SES neighbourhood was associated with worse AL (AL difference =-0.046; 95%CI[1] -0.079, -0.012).<br/><br/>         The relationship between neighbourhood deprivation and AL did not vary significantly by gender, household poverty, or race/ethnicity.<br/><br/>         System-specific analysis revealed stronger associations in the sub index of the metabolic and cardiovascular system.</p> |

|                                    |                                                                                                            |                                                                                                                                                                                                                                                                                                                               |                                                                                                                                                                                                                                                                                                                                                                                                                                                                    |                                                                                                                                                                                                                                                                                                                                                                                                   |                                                                                                    |      |                                                                                                                                                                                                                                                                              |
|------------------------------------|------------------------------------------------------------------------------------------------------------|-------------------------------------------------------------------------------------------------------------------------------------------------------------------------------------------------------------------------------------------------------------------------------------------------------------------------------|--------------------------------------------------------------------------------------------------------------------------------------------------------------------------------------------------------------------------------------------------------------------------------------------------------------------------------------------------------------------------------------------------------------------------------------------------------------------|---------------------------------------------------------------------------------------------------------------------------------------------------------------------------------------------------------------------------------------------------------------------------------------------------------------------------------------------------------------------------------------------------|----------------------------------------------------------------------------------------------------|------|------------------------------------------------------------------------------------------------------------------------------------------------------------------------------------------------------------------------------------------------------------------------------|
|                                    |                                                                                                            |                                                                                                                                                                                                                                                                                                                               |                                                                                                                                                                                                                                                                                                                                                                                                                                                                    | . Glycated haemoglobin (metabolic)<br>. Systolic BP (cardiovascular)<br>. Diastolic BP (cardiovascular)<br>. Resting heart rate (cardiovascular)                                                                                                                                                                                                                                                  |                                                                                                    |      |                                                                                                                                                                                                                                                                              |
| Merkin 2009 USA<br>Cross-sectional | To evaluate the association between neighbourhood SES and AL separately in three major race/ethnic groups. | <b>Sample:</b> 13,199 adults from 1772 census tracts<br><b>Study:</b> Third National Health and Nutrition Examination Survey (1988-1994) (NHANES III).<br><b>Age:</b> 41y (median)<br><b>Gender:</b> 51.9% females<br><b>Ethnicity:</b> non-Hispanic whites, non-Hispanic blacks and Mexican Americans.<br><b>Region:</b> USA | Sum of six census tract-level standardized variables (then categorized in quintiles):<br>. % of family households with children not headed by female<br>. % of male population ages 16 and older that is employed<br>. % of households that do not receive public assistance income<br>. % of households with income higher than the poverty threshold<br>. Median household income<br>. % of population 25 and older with high school diploma or higher education | <b>Calculus:</b> Sum of dichotomized biomarkers based on clinically accepted "high risk" criteria.<br><br><b>Biomarkers:</b> 9 biomarkers<br>On inflammatory, metabolic and cardiovascular systems:<br>. Albumin<br>. C-reactive protein<br>. Waist-to-hip ratio<br>. Total cholesterol<br>. HDL cholesterol<br>. Glycated haemoglobin<br>. Systolic BP<br>. Diastolic BP<br>. Resting heart rate | .Age<br>.US birth<br>.urban/rural location<br>.individual SES (education and poverty income ratio) | None | Blacks living in the lowest SES neighbourhoods had over twice the odds of a high AL score as compared with those living in the highest neighbourhood SES quintile (OR: 2.2, 95%CI: 1.1, 4.1).<br><br>Non-significant trends were seen for both whites and Mexican Americans. |

AL=Allostatic load; CBR=Cumulative biological risk; BMI=Body mass index; BP=Blood Pressure; DHEA-S=Dehydroepiandrosterone sulfate; HbA1C=glycosylated hemoglobin; HDL=High-density lipoprotein; HOMA-IR=Homeostatic model assessment insulin resistance; IBIs=Inter-beat intervals; ICAM-1=Intercellular adhesion molecule 1; IL-6= Interleukin 6; IRR=Incidence Rate Ratio; LDL=Low-density lipoprotein; OR=Odds ratio; RMSSD=Root Mean Square of the Successive Differences (Heart rate variability); SAMS= small-area market statistics; SES=Socioeconomic status; 95%CI=95% Confidence Interval.
